# Supplementary material
Source: PubMed Central journal article supplement (PMC7356417)
Supplement: tpmd190967.SD1.pdf [file tpmd190967.SD1.pdf]

Supplemental Table 1: Analysis of entomological indices for immature forms of *Aedes Aegypti* according to seasons in Surat city, Gujarat, India, 2012-16

| Seasons      | Median HI %<br>(Min-Max) | Median BI%<br>(Min-Max) | Median CI%<br>(Min-Max) | Median VD<br>(Min-Max) |
|--------------|--------------------------|-------------------------|-------------------------|------------------------|
| Winter       | 0.5 (0.0-1.5)            | 0.5 (0-1.5)             | 0.3 (0-0.8)             | 0.6 (0.3-0.8)          |
| Pre Monsoon  | 0.6 (0.0-2.5)            | 0.6 (0.0-2.5)           | 0.2 (0.0-1.2)           | 0.6 (0.4-1)            |
| Monsoon      | 0.7 (0.0-16.7)           | 0.7 (0.0-68.9)          | 0.3 (0.0-46.9)          | 1.4 (0.7-3.2)          |
| Post Monsoon | 0.7 (0.0-6.0)            | 0.7 (0.0-51.9)          | 0.3 (0.0-24.6)          | 1.0 (0.5-2)            |
| Overall      | 0.7 (0.0-16.7)           | 0.7 (0.0-68.9)          | 0.3 (0.0-46.9)          | 0.8 (0.3-3.2)          |
